# Supplementary material for: TProtective Factors for Sustaining Robustness in Older Adults: An 8-Year Multinational Longitudinal Study Using SHARE Data
Source: Research Square preprint supplement (doi:10.21203/rs.3.rs-9345466/v1), 2026-05-18
Supplement: Supplementary file 1 [file a83d1a55e92e4e4a1df5d846.xlsx]

## Sheet: Age groups
	Total population	Age 65-85			Age 65-74			Age 75-85
		Odds Ratio ±SD	z-score	p-value	Odds Ratio ±SD	z-score	p-value	Odds Ratio ±SD	z-score	p-value
Wave 4-5: Logistic Regression	N	N=7,768			5753			2015
	Age	0.945±0.004	-10.93	<0.001	0.951 ±0.009	-4.82	<0.001	0.950±0.017	-2.76	0.006
	Male	1.229±0.066	3.8	<0.001	1.232±0.078	3.28	0.001	1.200±0.127	1.71	0.087
	Education	1.007±0.006	1.26	0.207	1.007±0.007	1.06	0.289	1.006±0.011	0.6	0.551
	Single	1.004±0.057	0.07	0.944	1.041±0.071	0.59	0.553	0.922±0.096	-0.77	0.438
	Financial distress	1.162±0.034	5.09	<0.001	1.167±0.040	4.44	<0.001	1.161±0.065	2.63	0.009
	Chronic diseases	0.916±0.018	-4.4	<0.001	0.904±0.021	-4.19	<0.001	0.939±0.033	-1.72	0.085
	Self-reported health status	0.720±0.021	-11.1	<0.001	0.719±0.024	-9.47	<0.001	0.714±0.040	-5.88	<0.001
	Performed voluntary or charity work	0.998±0.062	-0.02	0.985	0.970±0.070	-0.42	0.678	1.092±0.137	0.7	0.483
	Attended an educational or training course	1.046±0.089	0.53	0.596	1.062±0.101	0.63	0.526	0.977±0.192	-0.11	0.909
	Belong to a sport, social or other club	1.238±0.067	3.95	<0.001	1.259±0.079	3.64	<0.001	1.210±0.126	1.82	0.068
	Participate in religious activities (church, synagogue, mosque, etc.)	1.103±0.077	1.4	0.163	1.180±0.102	1.91	0.056	0.965±0.120	-0.28	0.776
	Belong to a political or community-related organization	1.233±0.130	1.98	0.048	1.192±0.145	1.44	0.151	1.371±0.293	1.48	0.139
	Read books, magazines or newspapers	1.032± 0.072	0.45	0.655	1.001± 0.084	0.01	0.989	1.126± 0.149	0.9	0.369
	Did word or number games such as crossword puzzles or Sudoku	1.134±0.060	2.38	0.017	1.112±0.069	1.7	0.089	1.177±0.118	1.62	0.106
	Played cards or board games (chess)	1.005±0.054	0.1	0.919	1.065±0.067	1	0.316	0.858±0.091	-1.43	0.152
	Vigorous physical activity	1.072±0.020	3.61	<0.001	1.052±0.024	2.23	0.025	1.116±0.040	3.02	0.003
	Moderate physical activity	1.389±0.097	4.67	<0.001	1.454±0.121	4.5	<0.001	1.245±0.165	1.66	0.097
	Smoke_	0.994±0.054	-0.1	0.923	1.001±0.064	0.03	0.977	0.991±0.102	-0.09	0.932
	Drinking	0.948±0.063	-0.79	0.428	0.991±0.074	-0.12	0.906	0.811±0.119	-1.42	0.156
	BMI	0.986±0.006	-2.09	0.037	0.994±0.007	-0.81	0.419	0.967±0.012	-2.61	0.009
Wave 4-6: Logistic	N	6677			5011			1666
	Age	0.926±0.005	-13.57	<0.001	0.934±0.010	-6.2	<0.001	0.928±0.019	-3.55	<0.001
	Male	1.217±0.070	3.37	0.001	1.237±0.082	3.18	0.001	1.140±0.137	1.09	0.276
	Education	1.009±0.006	1.46	0.145	1.008±0.007	1.2	0.231	1.009±0.012	0.72	0.472
	Single	0.957±0.058	-0.72	0.473	0.957±0.068	-0.61	0.542	0.936±0.110	-0.56	0.575
	Financial distress	1.137±0.035	4.11	<0.001	1.150±0.041	3.87	<0.001	1.102±0.070	1.53	0.125
	Chronic diseases	0.897±0.019	-5	<0.001	0.890±0.022	-4.54	<0.001	0.904±0.037	-2.44	0.015
	Self-reported health status	0.719±0.022	-10.49	<0.001	0.720±0.026	-8.98	<0.001	0.721±0.045	-5.21	<0.001
	Performed voluntary or charity work	1.032±0.071	0.46	0.644	1.076±0.085	0.93	0.353	0.888±0.129	-0.82	0.414
	Attended an educational or training course	1.075±0.097	0.8	0.422	0.974±0.097	-0.26	0.796	1.725±0.376	2.5	0.012
	Belong to a sport, social or other club	1.206±0.070	3.2	0.001	1.330±0.090	4.2	<0.001	0.893±0.107	-0.94	0.349
	Participate in religious activities (church, synagogue, mosque, etc.)	1.025±0.074	0.34	0.73	1.057±0.091	0.65	0.518	0.948±0.129	-0.39	0.7
	Belong to a political or community-related organization	1.103±0.123	0.88	0.381	0.989±0.125	-0.08	0.934	1.669±0.395	2.16	0.031
	Read books, magazines or newspapers	1.163± 0.085	2.05	0.04	1.060± 0.090	0.68	0.493	1.553± 0.235	2.91	0.004
	Did word or number games such as crossword puzzles or Sudoku	1.147±0.065	2.41	0.016	1.143±0.075	2.03	0.043	1.165±0.133	1.34	0.18
	Played cards or board games (chess)	1.058±0.061	0.97	0.331	1.067±0.071	0.98	0.327	1.039±0.125	0.32	0.746
	Vigorous physical activity	1.044±0.021	2.09	0.036	1.042±0.025	1.72	0.085	1.049±0.043	1.17	0.242
	Moderate physical activity	1.216±0.092	2.58	0.01	1.231±0.107	2.39	0.017	1.192±0.188	1.12	0.265
	Smoke_w4	1.026±0.058	0.45	0.654	0.952±0.063	-0.73	0.464	1.313±0.151	2.37	0.018
	Drinking_w4	0.918±0.065	-1.19	0.236	0.922±0.073	-1.01	0.311	0.891±0.149	-0.68	0.494
	BMI	0.995±0.006	-0.74	0.456	0.993±0.007	-0.81	0.417	1.002±0.014	0.21	0.836
Wave 4-7: Logistic Regression	N	2723			2074			646
	Age	0.916±0.008	-9.68	<0.001	0.924±0.0155	-4.69	<0.001	0.960±0.034	-1.11	0.265
	Male	1.205±0.108	2.09	0.037	1.171±0.118	1.56	0.119	1.300±0.256	1.33	0.182
	Education	0.996±0.0103	-0.33	0.74	0.996±0.012	-0.26	0.795	0.994±0.020	-0.28	0.783
	Single	1.004±0.099	0.04	0.967	1.012±0.117	0.11	0.916	0.951±0.191	-0.24	0.807
	Financial distress	1.099±0.056	1.85	0.065	1.098±0.062	1.63	0.102	1.115±0.130	0.94	0.35
	Chronic diseases	0.906±0.033	-2.69	0.007	0.924±0.039	-1.86	0.063	0.849±0.065	-2.12	0.034
	Self-reported health status	0.725±0.036	-6.43	<0.001	0.728±0.041	-5.55	<0.001	0.723±0.074	-3.14	0.002
	Performed voluntary or charity work	1.046±0.106	0.44	0.658	1.028±0.119	0.24	0.811	1.135±0.243	0.59	0.555
	Attended an educational or training course	1.454±0.200	2.72	0.007	1.326±0.201	1.86	0.062	2.288±0.753	2.52	0.012
	Belong to a sport, social or other club	1.106±0.100	1.11	0.265	1.107±0.114	0.99	0.324	1.104±0.214	0.51	0.609
	Participate in religious activities (church, synagogue, mosque, etc.)	1.281±0.140	2.26	0.024	1.198±0.155	1.4	0.162	1.487±0.308	1.91	0.056
	Belong to a political or community-related organization	0.875±0.146	-0.79	0.427	0.897±0.170	-0.57	0.568	0.898±0.314	-0.31	0.76
	Read books, magazines or newspapers	1.298± 0.148	2.29	0.022	1.396± 0.182	2.56	0.011	1.002± 0.240	0.01	0.993
	Did word or number games such as crossword puzzles or Sudoku	1.101±0.101	1.06	0.291	1.040±0.109	0.38	0.707	1.316±0.253	1.43	0.153
	Played cards or board games (chess)	0.920±0.083	-0.91	0.362	0.882±0.090	-1.22	0.224	1.076±0.212	0.37	0.711
	Vigorous physical activity	1.110±0.036	3.17	0.002	1.113±0.042	2.82	0.005	1.095±0.738	1.35	0.178
	Moderate physical activity	1.386±0.174	2.61	0.009	1.413±0.197	2.48	0.013	1.274±0.367	0.84	0.401
	Smoke_w4	0.308±0.251	-1.44	0.15	0.427±0.347	-1.05	0.296	(omitted)
	Drinking_w4	0.816±0.089	-1.86	0.063	0.806±0.096	-1.8	0.072	0.883±0.237	-0.46	0.645
	BMI	0.975±0.010	-2.22	0.026	0.975±0.012	-2.02	0.044	0.983±0.245	-0.65	0.513
Wave 4-8: Logistic Regression	N	4170			3264			906
	Age	0.906±0.007	-12.63	<0.001	0.936±0.012	-4.91	<0.001	0.876±0.029	-3.9	<0.001
	Male	1.213±0.089	2.62	0.009	1.300±0.105	3.24	0.001	0.855±0.158	-0.84	0.4
	Education	1.002±0.007	0.3	0.765	1.000±0.008	0.06	0.949	1.011±0.018	0.66	0.512
	Single	0.970±0.075	-0.38	0.705	0.959±0.083	-0.47	0.635	1.023±0.181	0.13	0.898
	Financial distress	1.118±0.044	2.8	0.005	1.109±0.048	2.37	0.018	1.250±0.126	2.21	0.027
	Chronic diseases	0.898±0.025	-3.75	<0.001	0.893±0.028	-3.49	<0.001	0.906±0.058	-1.52	0.129
	Self-reported health status	0.752±0.029	-7.23	<0.001	0.764±0.033	-6.17	<0.001	0.717±0.067	-3.53	<0.001
	Performed voluntary or charity work	1.013±0.083	0.16	0.872	1.002±0.091	0.03	0.979	1.032±0.212	0.16	0.875
	Attended an educational or training course	1.146±0.123	1.27	0.203	1.141±0.131	1.14	0.253	1.279±0.382	0.82	0.41
	Belong to a sport, social or other club	1.120±0.080	1.58	0.114	1.107±0.088	1.29	0.199	1.195±0.211	1.01	0.312
	Participate in religious activities (church, synagogue, mosque, etc.)	0.918±0.081	-0.96	0.337	0.901±0.090	-1.03	0.301	0.943±0.187	-0.29	0.768
	Belong to a political or community-related organization	0.962±0.126	-0.29	0.773	0.965±0.138	-0.24	0.807	0.900±0.304	-0.31	0.757
	Read books, magazines or newspapers	1.142± 0.112	1.35	0.178	1.340± 0.146	2.67	0.008	0.551± 0.124	-2.64	0.008
	Did word or number games such as crossword puzzles or Sudoku	1.117±0.080	1.55	0.12	1.067±0.085	0.82	0.41	1.352±0.231	1.76	0.078
	Played cards or board games (chess)	1.037±0.075	0.5	0.615	1.033±0.082	0.41	0.678	1.020±0.184	0.11	0.91
	Vigorous physical activity	1.073±0.028	2.64	0.008	1.095±0.032	3.02	0.002	0.982±0.060	-0.29	0.773
	Moderate physical activity	1.225±0.123	2.02	0.043	1.136±0.124	1.17	0.244	1.825±0.501	2.19	0.028
	Smoke	0.960±0.714	-0.54	0.592	0.957±0.079	-0.53	0.6	1.035±0.182	0.2	0.843
	Drinking	0.965±0.087	-0.39	0.7	0.960±0.093	-0.42	0.675	0.929±0.237	-0.29	0.774
	BMI	0.983±0.008	-1.88	0.06	0.982±0.009	-1.85	0.064	0.996±0.021	-0.15	0.879

## Sheet: Sheet4
	Total population	Age 65-85			Age 65-74			Age 75-85
		Odds Ratio ±SD	z-score	p-value	Odds Ratio ±SD	z-score	p-value	Odds Ratio ±SD	z-score	p-value
Wave 4-5: Logistic Regression	N	N=7,768			5753			2015
	Age	0.945±0.004	-10.93	0	0.951 ±0.009	-4.82	0	0.950±0.017	-2.76	0.006
	Male	1.229±0.066	3.8	0	1.232±0.078	3.28	0.001	1.200±0.127	1.71	0.087
	Education	1.007±0.006	1.26	0.207	1.007±0.007	1.06	0.289	1.006±0.011	0.6	0.551
	Single	1.004±0.057	0.07	0.944	1.041±0.071	0.59	0.553	0.922±0.096	-0.77	0.438
	Financial distress	1.162±0.034	5.09	0	1.167±0.040	4.44	0	1.161±0.065	2.63	0.009
	Chronic diseases	0.916±0.018	-4.4	0	0.904±0.021	-4.19	0	0.939±0.033	-1.72	0.085
	Self-reported health status	0.720±0.021	-11.1	0	0.719±0.024	-9.47	0	0.714±0.040	-5.88	0
	AC1 – Done voluntary or charity work	0.998±0.062	-0.02	0.985	0.970±0.070	-0.42	0.678	1.092±0.137	0.7	0.483
	AC4 – Attended an educational or training course	1.046±0.089	0.53	0.596	1.062±0.101	0.63	0.526	0.977±0.192	-0.11	0.909
	AC5 – Gone to a sport, social or other kind of club	1.238±0.067	3.95	0	1.259±0.079	3.64	0	1.210±0.126	1.82	0.068
	AC6 – Taken part in activities of a religious organization (church, synagogue, mosque etc.)	1.103±0.077	1.4	0.163	1.180±0.102	1.91	0.056	0.965±0.120	-0.28	0.776
	AC7 – Taken part in a political or community-related organization	1.233±0.130	1.98	0.048	1.192±0.145	1.44	0.151	1.371±0.293	1.48	0.139
	AC8 – Read books, magazines or newspapers	1.032± 0.072	0.45	0.655	1.001± 0.084	0.01	0.989	1.126± 0.149	0.9	0.369
	AC9 – Did word or number games such as crossword puzzles or Sudoku	1.134±0.060	2.38	0.017	1.112±0.069	1.7	0.089	1.177±0.118	1.62	0.106
	AC10 – Played cards or games such as chess	1.005±0.054	0.1	0.919	1.065±0.067	1	0.316	0.858±0.091	-1.43	0.152
	BR 015 vigorous physical activity	1.072±0.020	3.61	0	1.052±0.024	2.23	0.025	1.116±0.040	3.02	0.003
	BR 016 moderate physical activity	1.389±0.097	4.67	0	1.454±0.121	4.5	0	1.245±0.165	1.66	0.097
	Smoke_	0.994±0.054	-0.1	0.923	1.001±0.064	0.03	0.977	0.991±0.102	-0.09	0.932
	Drinking	0.948±0.063	-0.79	0.428	0.991±0.074	-0.12	0.906	0.811±0.119	-1.42	0.156
	BMI	0.986±0.006	-2.09	0.037	0.994±0.007	-0.81	0.419	0.967±0.012	-2.61	0.009
Wave 4-6: Logistic		Age 65-85			Age 65-74			Age 75-85
	N	6677			5011			1666
	Age	0.926±0.005	-13.57	0	0.934±0.010	-6.2	0	0.928±0.019	-3.55	0
	Male	1.217±0.070	3.37	0.001	1.237±0.082	3.18	0.001	1.140±0.137	1.09	0.276
	Education	1.009±0.006	1.46	0.145	1.008±0.007	1.2	0.231	1.009±0.012	0.72	0.472
	Single	0.957±0.058	-0.72	0.473	0.957±0.068	-0.61	0.542	0.936±0.110	-0.56	0.575
	Financial distress	1.137±0.035	4.11	0	1.150±0.041	3.87	0	1.102±0.070	1.53	0.125
	Chronic diseases	0.897±0.019	-5	0	0.890±0.022	-4.54	0	0.904±0.037	-2.44	0.015
	Self-reported health status	0.719±0.022	-10.49	0	0.720±0.026	-8.98	0	0.721±0.045	-5.21	0
	AC1 – Done voluntary or charity work	1.032±0.071	0.46	0.644	1.076±0.085	0.93	0.353	0.888±0.129	-0.82	0.414
	AC4 – Attended an educational or training course	1.075±0.097	0.8	0.422	0.974±0.097	-0.26	0.796	1.725±0.376	2.5	0.012
	AC5 – Gone to a sport, social or other kind of club	1.206±0.070	3.2	0.001	1.330±0.090	4.2	0	0.893±0.107	-0.94	0.349
	AC6 – Taken part in activities of a religious organization (church, synagogue, mosque etc.)	1.025±0.074	0.34	0.73	1.057±0.091	0.65	0.518	0.948±0.129	-0.39	0.7
	AC7 – Taken part in a political or community-related organization	1.103±0.123	0.88	0.381	0.989±0.125	-0.08	0.934	1.669±0.395	2.16	0.031
	AC8 – Read books, magazines or newspapers	1.163± 0.085	2.05	0.04	1.060± 0.090	0.68	0.493	1.553± 0.235	2.91	0.004
	AC9 – Did word or number games such as crossword puzzles or Sudoku	1.147±0.065	2.41	0.016	1.143±0.075	2.03	0.043	1.165±0.133	1.34	0.18
	AC10 – Played cards or games such as chess	1.058±0.061	0.97	0.331	1.067±0.071	0.98	0.327	1.039±0.125	0.32	0.746
	BR 015 vigorous physical activity	1.044±0.021	2.09	0.036	1.042±0.025	1.72	0.085	1.049±0.043	1.17	0.242
	BR 016 moderate physical activity	1.216±0.092	2.58	0.01	1.231±0.107	2.39	0.017	1.192±0.188	1.12	0.265
	Smoke_w4	1.026±0.058	0.45	0.654	0.952±0.063	-0.73	0.464	1.313±0.151	2.37	0.018
	Drinking_w4	0.918±0.065	-1.19	0.236	0.922±0.073	-1.01	0.311	0.891±0.149	-0.68	0.494
	BMI	0.995±0.006	-0.74	0.456	0.993±0.007	-0.81	0.417	1.002±0.014	0.21	0.836
		Age 65-85			Age 65-74			Age 75-85
Wave 4-7: Logistic Regression	N	2723			2074			646
	Age	0.916±0.008	-9.68	0	0.924±0.0155	-4.69	0	0.960±0.034	-1.11	0.265
	Male	1.205±0.108	2.09	0.037	1.171±0.118	1.56	0.119	1.300±0.256	1.33	0.182
	Education	0.996±0.0103	-0.33	0.74	0.996±0.012	-0.26	0.795	0.994±0.020	-0.28	0.783
	Single	1.004±0.099	0.04	0.967	1.012±0.117	0.11	0.916	0.951±0.191	-0.24	0.807
	Financial distress	1.099±0.056	1.85	0.065	1.098±0.062	1.63	0.102	1.115±0.130	0.94	0.35
	Chronic diseases	0.906±0.033	-2.69	0.007	0.924±0.039	-1.86	0.063	0.849±0.065	-2.12	0.034
	Self-reported health status	0.725±0.036	-6.43	0	0.728±0.041	-5.55	0	0.723±0.074	-3.14	0.002
	AC1 – Done voluntary or charity work	1.046±0.106	0.44	0.658	1.028±0.119	0.24	0.811	1.135±0.243	0.59	0.555
	AC4 – Attended an educational or training course	1.454±0.200	2.72	0.007	1.326±0.201	1.86	0.062	2.288±0.753	2.52	0.012
	AC5 – Gone to a sport, social or other kind of club	1.106±0.100	1.11	0.265	1.107±0.114	0.99	0.324	1.104±0.214	0.51	0.609
	AC6 – Taken part in activities of a religious organization (church, synagogue, mosque etc.)	1.281±0.140	2.26	0.024	1.198±0.155	1.4	0.162	1.487±0.308	1.91	0.056
	AC7 – Taken part in a political or community-related organization	0.875±0.146	-0.79	0.427	0.897±0.170	-0.57	0.568	0.898±0.314	-0.31	0.76
	AC8 – Read books, magazines or newspapers	1.298± 0.148	2.29	0.022	1.396± 0.182	2.56	0.011	1.002± 0.240	0.01	0.993
	AC9 – Did word or number games such as crossword puzzles or Sudoku	1.101±0.101	1.06	0.291	1.040±0.109	0.38	0.707	1.316±0.253	1.43	0.153
	AC10 – Played cards or games such as chess	0.920±0.083	-0.91	0.362	0.882±0.090	-1.22	0.224	1.076±0.212	0.37	0.711
	BR 015 vigorous physical activity	1.110±0.036	3.17	0.002	1.113±0.042	2.82	0.005	1.095±0.738	1.35	0.178
	BR 016 moderate physical activity	1.386±0.174	2.61	0.009	1.413±0.197	2.48	0.013	1.274±0.367	0.84	0.401
	Smoke_w4	0.308±0.251	-1.44	0.15	0.427±0.347	-1.05	0.296	1±(omitted)
	Drinking_w4	0.816±0.089	-1.86	0.063	0.806±0.096	-1.8	0.072	0.883±0.237	-0.46	0.645
	BMI	0.975±0.010	-2.22	0.026	0.975±0.012	-2.02	0.044	0.983±0.245	-0.65	0.513
Wave 4-8: Logistic Regression		Age 65-85			Age 65-74			Age 74-85
	N	4170			3264			906
	Age	0.906±0.007	-12.63	0	0.936±0.012	-4.91	0	0.876±0.029	-3.9	0
	Male	1.213±0.089	2.62	0.009	1.300±0.105	3.24	0.001	0.855±0.158	-0.84	0.4
	Education	1.002±0.007	0.3	0.765	1.000±0.008	0.06	0.949	1.011±0.018	0.66	0.512
	Single	0.970±0.075	-0.38	0.705	0.959±0.083	-0.47	0.635	1.023±0.181	0.13	0.898
	Financial distress	1.118±0.044	2.8	0.005	1.109±0.048	2.37	0.018	1.250±0.126	2.21	0.027
	Chronic diseases	0.898±0.025	-3.75	0	0.893±0.028	-3.49	0	0.906±0.058	-1.52	0.129
	Self-reported health status	0.752±0.029	-7.23	0	0.764±0.033	-6.17	0	0.717±0.067	-3.53	0
	AC1 – Done voluntary or charity work	1.013±0.083	0.16	0.872	1.002±0.091	0.03	0.979	1.032±0.212	0.16	0.875
	AC4 – Attended an educational or training course	1.146±0.123	1.27	0.203	1.141±0.131	1.14	0.253	1.279±0.382	0.82	0.41
	AC5 – Gone to a sport, social or other kind of club	1.120±0.080	1.58	0.114	1.107±0.088	1.29	0.199	1.195±0.211	1.01	0.312
	AC6 – Taken part in activities of a religious organization (church, synagogue, mosque etc.)	0.918±0.081	-0.96	0.337	0.901±0.090	-1.03	0.301	0.943±0.187	-0.29	0.768
	AC7 – Taken part in a political or community-related organization	0.962±0.126	-0.29	0.773	0.965±0.138	-0.24	0.807	0.900±0.304	-0.31	0.757
	AC8 – Read books, magazines or newspapers	1.142± 0.112	1.35	0.178	1.340± 0.146	2.67	0.008	0.551± 0.124	-2.64	0.008
	AC9 – Did word or number games such as crossword puzzles or Sudoku	1.117±0.080	1.55	0.12	1.067±0.085	0.82	0.41	1.352±0.231	1.76	0.078
	AC10 – Played cards or games such as chess	1.037±0.075	0.5	0.615	1.033±0.082	0.41	0.678	1.020±0.184	0.11	0.91
	BR 015 vigorous physical activity	1.073±0.028	2.64	0.008	1.095±0.032	3.02	0.002	0.982±0.060	-0.29	0.773
	BR 016 moderate physical activity	1.225±0.123	2.02	0.043	1.136±0.124	1.17	0.244	1.825±0.501	2.19	0.028
	Smoke	0.960±0.714	-0.54	0.592	0.957±0.079	-0.53	0.6	1.035±0.182	0.2	0.843
	Drinking	0.965±0.087	-0.39	0.7	0.960±0.093	-0.42	0.675	0.929±0.237	-0.29	0.774
	BMI	0.983±0.008	-1.88	0.06	0.982±0.009	-1.85	0.064	0.996±0.021	-0.15	0.879
